# Supplementary material
Source: PubMed Central journal article supplement (PMC7573796)
Supplement: jamaneurol-e203836-s002.pdf [file jamaneurol-e203836-s002.pdf]

## Supplementary Online Content

Shoamanesh A, Hart RG, Connolly SJ, et al. Microbleeds and the effect of anticoagulation in patients with embolic stroke of undetermined source: an exploratory analysis of the NAVIGATE ESUS randomized clinical trial. *JAMA Neurol*. Published online October 19, 2020. doi:10.1001/jamaneurol.2020.3836

**eFigure.** Kaplan-Meier Curves for Outcomes Stratified by CMB Burden

**eTable 1.** Baseline Characteristics and MRI Findings Between Included and Excluded Cohorts

**eTable 2.** Baseline Characteristics and MRI According to Number of Cerebral Microbleed Burden

**eTable 3.** Baseline Characteristics and MRI Findings by Cerebral Microbleed Topography

**eTable 4.** Recurrent Stroke Subtypes by Cerebral Microbleed Status

**eTable 5.** Efficacy in CMB Subgroups -- Recurrent Stroke

**eTable 6.** Efficacy in CMB Subgroups -- Ischemic Stroke

**eTable 7.** Efficacy in CMB Subgroups --All-Cause Mortality

**eTable 8.** Efficacy in CMB Subgroups --Intracerebral Hemorrhage

This supplementary material has been provided by the authors to give readers additional information about their work.

**eFigure.** Kaplan-Meier Curves for Outcomes Stratified by CMB Burden

a) Recurrent stroke

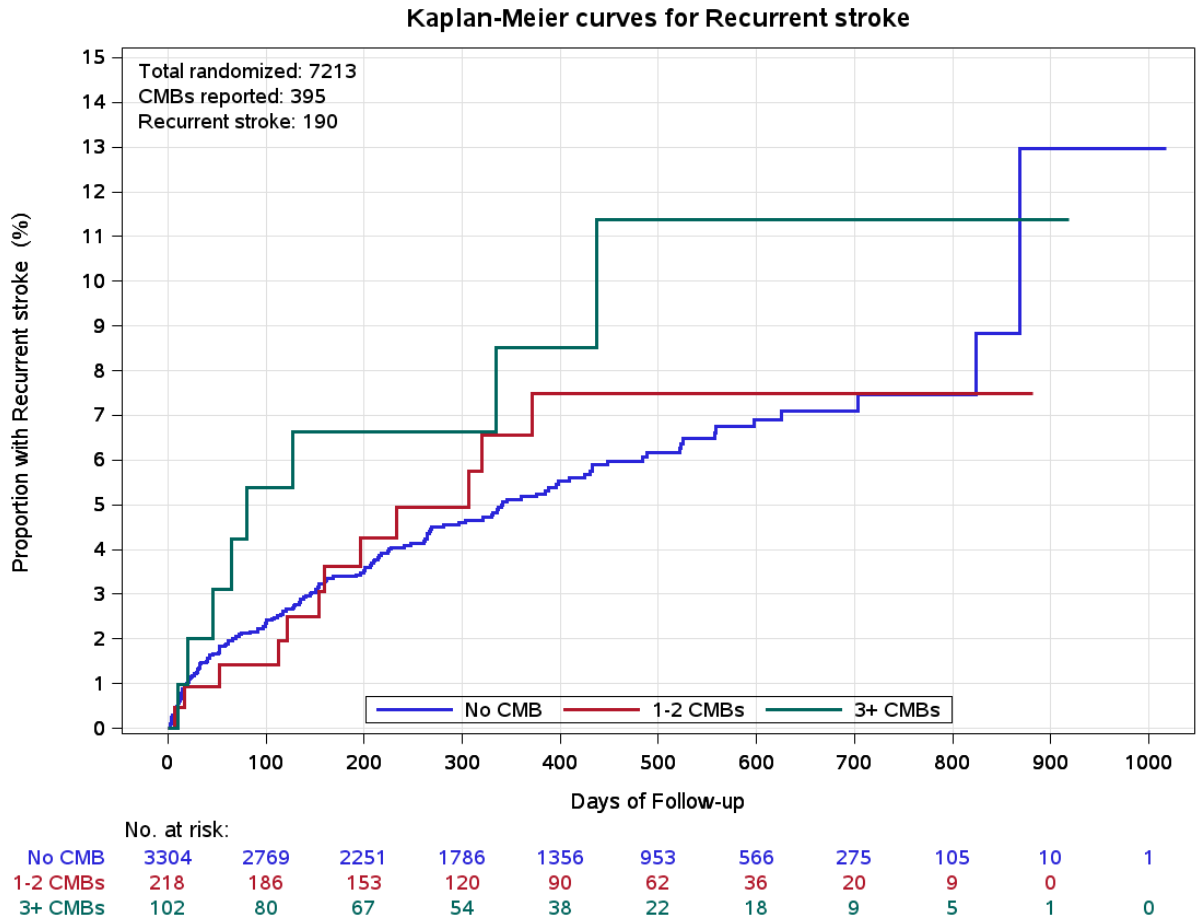

b) Ischemic stroke

Kaplan-Meier curves for Ischemic stroke

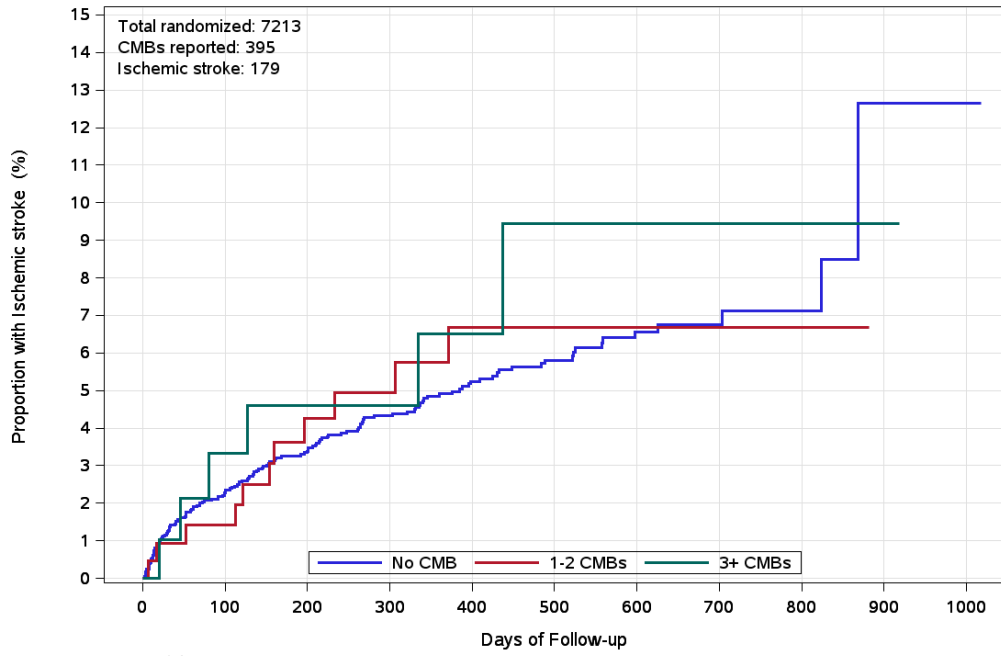

No. at risk:

|          | 0    | 100  | 200  | 300  | 400  | 500 | 600 | 700 | 800 | 900 | 1000 |
|----------|------|------|------|------|------|-----|-----|-----|-----|-----|------|
| No CMB   | 3304 | 2769 | 2251 | 1786 | 1356 | 953 | 566 | 275 | 105 | 10  | 1    |
| 1-2 CMBs | 218  | 186  | 153  | 120  | 90   | 62  | 36  | 20  | 9   | 0   | 0    |
| 3+ CMBs  | 102  | 80   | 67   | 54   | 38   | 22  | 18  | 9   | 5   | 1   | 0    |

c) Intracerebral Hemorrhage

Kaplan-Meier curves for Intracerebral hemorrhage

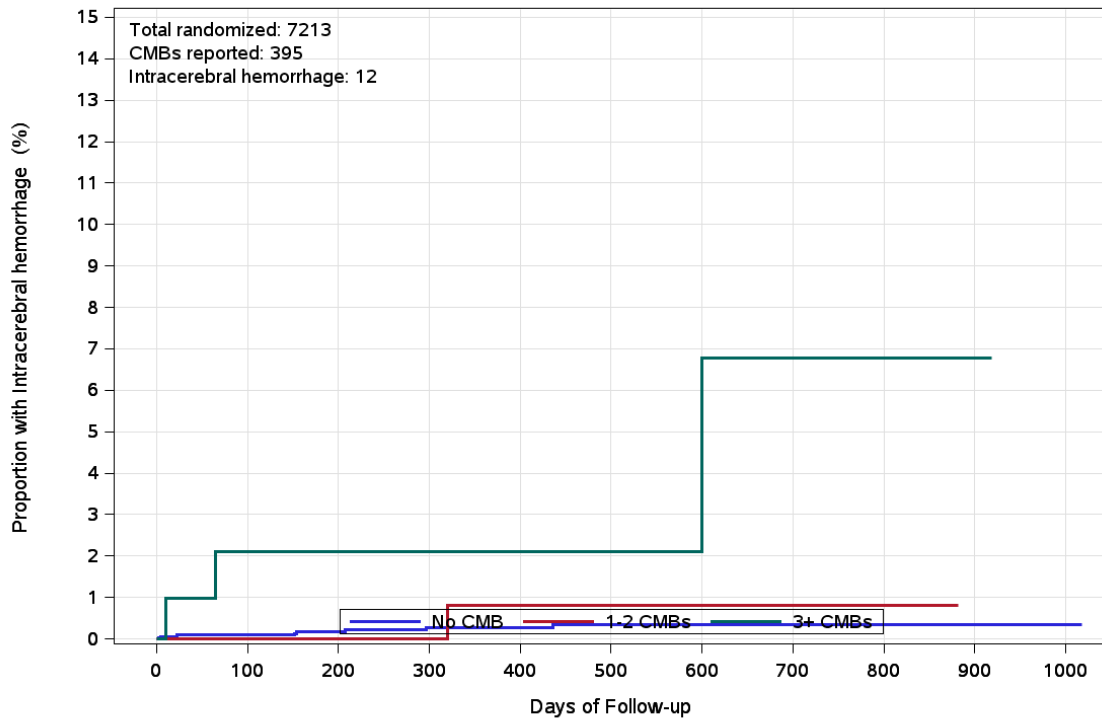

| No. at risk: |      | 0    | 100  | 200  | 300  | 400  | 500 | 600 | 700 | 800 | 900 | 1000 |
|--------------|------|------|------|------|------|------|-----|-----|-----|-----|-----|------|
| No CMB       | 3304 | 2837 | 2332 | 1860 | 1428 | 1008 | 608 | 295 | 108 | 11  | 1   |      |
| 1-2 CMBs     | 218  | 190  | 158  | 126  | 94   | 64   | 38  | 22  | 10  | 0   |     |      |
| 3+ CMBs      | 102  | 82   | 70   | 55   | 40   | 25   | 21  | 11  | 7   | 1   | 0   |      |

d) All-Cause Mortality

**Kaplan-Meier curves for All Cause Mortality**

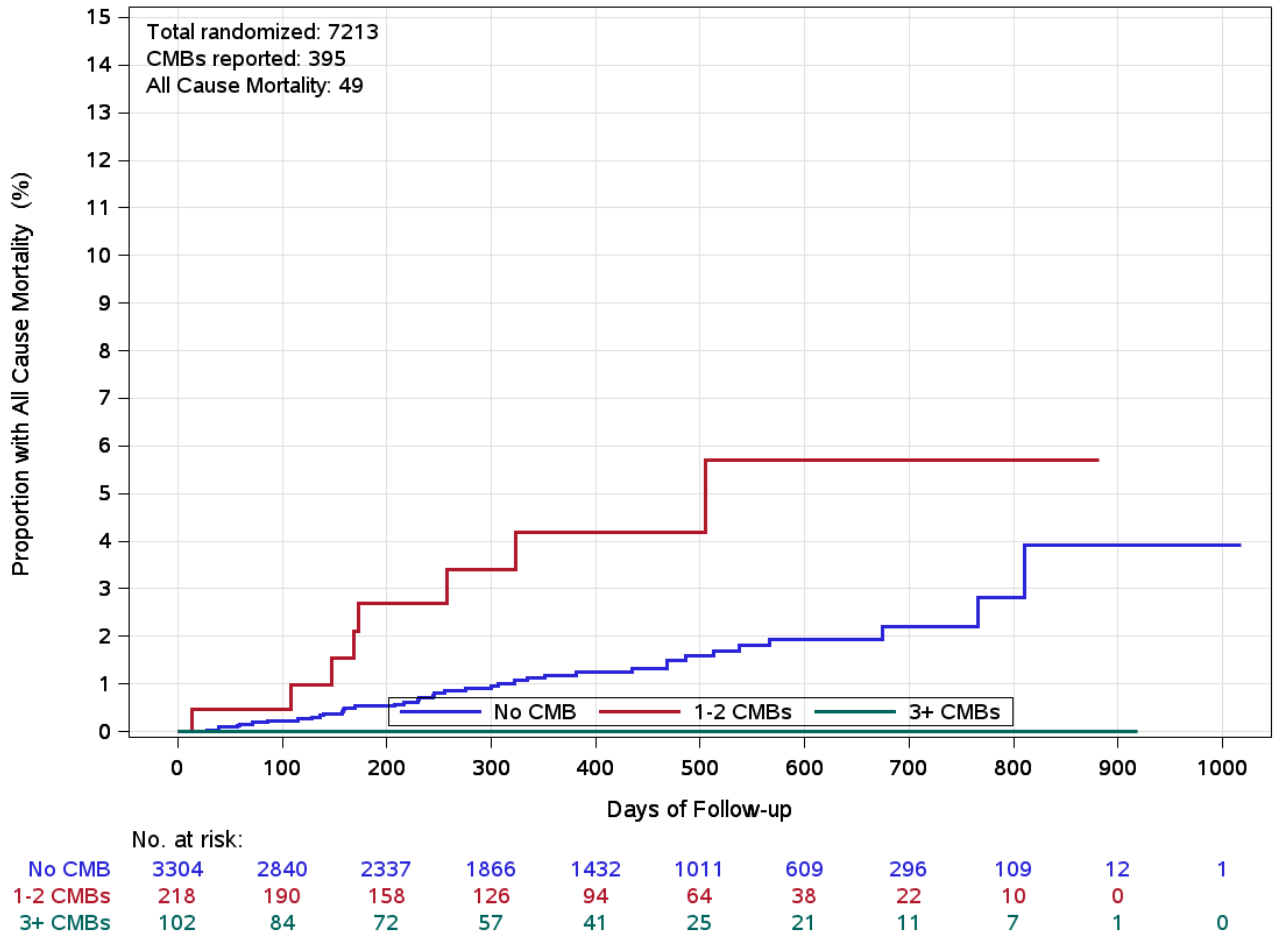

**eTable 1.** Baseline Characteristics and MRI Findings Between Included and Excluded Cohorts

| Characteristic                             | Included cohort <sub>USEP</sub> (N=3699) | Excluded cohort <sub>USEP</sub> (N=3514) | pvalue |
|--------------------------------------------|------------------------------------------|------------------------------------------|--------|
| Age, years (mean ± s.d.)                   | 67.0±9.8                                 | 66.8±9.7                                 | 0.3776 |
| Age<60 years                               | 23 %                                     | 24 %                                     | 0.4064 |
| Male sex                                   | 63 %                                     | 60 %                                     | 0.0466 |
| <b>Race:</b>                               |                                          |                                          |        |
| White only                                 | 65 %                                     | 80 %                                     | <.0001 |
| Black only                                 | 2 %                                      | 1 %                                      | 0.6911 |
| East Asian only                            | 25 %                                     | 14 %                                     | <.0001 |
| Others (includes not reported/multiracial) | 8 %                                      | 5 %                                      | <.0001 |

|                                                                             |                   |                   |        |
|-----------------------------------------------------------------------------|-------------------|-------------------|--------|
| <b>Global region:</b>                                                       |                   |                   |        |
| U.S.A. and Canada                                                           | 16 %              | 9 %               | <.0001 |
| Latin America                                                               | 7 %               | 14 %              | <.0001 |
| Western Europe                                                              | 45 %              | 41 %              | 0.0009 |
| Eastern Europe                                                              | 8 %               | 23 %              | <.0001 |
| East Asia                                                                   | 24 %              | 14 %              | <.0001 |
| <b>Medical history:</b>                                                     |                   |                   |        |
| Hypertension                                                                | 76 %              | 79 %              | 0.0002 |
| Diabetes mellitus                                                           | 25 %              | 25 %              | 0.6184 |
| Current tobacco use                                                         | 21 %              | 20 %              | 0.8266 |
| Coronary artery disease                                                     | 6 %               | 7 %               | 0.1262 |
| Heart failure                                                               | 2 %               | 5 %               | <.0001 |
| Cancer                                                                      | 10 %              | 7 %               | <.0001 |
| Bioprosthetic heart valve                                                   | 0 %               | 0 %               | 0.4392 |
| TIA                                                                         | 19 %              | 16 %              | 0.0008 |
| Renal dysfunction                                                           | 3 %               | 3 %               | 0.1203 |
| Liver disease                                                               | 2 %               | 1 %               | 0.3380 |
| History of GI bleeding                                                      | 2 %               | 1 %               | 0.0167 |
| CHADS <sub>2</sub> (median, IQR)                                            | 3.0 (3.0, 4.0)    | 3.0 (3.0, 4.0)    | 0.0026 |
| CHA <sub>2</sub> DS <sub>2</sub> -VASc (median, IQR)                        | 4.0 (3.0, 5.0)    | 4.0 (3.0, 5.0)    | 0.0728 |
| Estimated glomerular filtration rate (eGFR), mL/min per 1.73 m <sup>2</sup> | 77.9±20.3         | 79.4±20.8         | 0.0011 |
| <b>Functional measures at randomization:</b>                                |                   |                   |        |
| EQ-5D (median, IQR)                                                         | 80.0 (65.0, 90.0) | 75.0 (60.0, 85.0) | <.0001 |
| MoCA (median, IQR)                                                          | 25.0 (21.0, 27.0) | 24.0 (20.0, 27.0) | <.0001 |
| NIHSS score at randomization (median, IQR)                                  | 1.0 (0.0, 2.0)    | 1.0 (0.0, 3.0)    | <.0001 |
| Modified Rankin Scale (mRS) at randomization (median, IQR)                  | 1.0 (0.0, 2.0)    | 1.0 (0.0, 2.0)    | <.0001 |

**eTable 2.** Baseline Characteristics and MRI According to Number of Cerebral Microbleed Burden

| Characteristic                                       | Mild (1-2 CMBs)<br>(N=218) | Moderate (3-10 CMBs)<br>(N=85) | Severe (>10 CMBs)<br>(N=17) | pvalue  |
|------------------------------------------------------|----------------------------|--------------------------------|-----------------------------|---------|
| Age, years (mean ± s.d.)                             | 70.1±9.6                   | 68.7±9.4                       | 69.4±7.4                    | 0.55    |
| Age<60 years                                         | 16 %                       | 20 %                           | 6 %                         | 0.32    |
| Male sex                                             | 58 %                       | 65 %                           | 71 %                        | 0.37    |
| <b>Race:</b>                                         |                            |                                |                             |         |
| White only                                           | 54 %                       | 26 %                           | 29 %                        | <0.0001 |
| Black only                                           | 3 %                        | 2 %                            | 6 %                         | 0.72    |
| East Asian only                                      | 36 %                       | 62 %                           | 59 %                        | <0.0001 |
| Others (includes not reported/multiracial)           | 8 %                        | 9 %                            | 6 %                         | 0.85    |
| <b>Global region:</b>                                |                            |                                |                             |         |
| U.S.A. and Canada                                    | 18 %                       | 13 %                           | 12 %                        | 0.51    |
| Latin America                                        | 2 %                        | 4 %                            | 6 %                         | 0.46    |
| Western Europe                                       | 40 %                       | 20 %                           | 24 %                        | 0.00    |
| Eastern Europe                                       | 6 %                        | 2 %                            | 0 %                         | 0.26    |
| East Asia                                            | 34 %                       | 61 %                           | 59 %                        | <0.0001 |
| <b>Medical history:</b>                              |                            |                                |                             |         |
| Hypertension                                         | 83 %                       | 91 %                           | 100 %                       | 0.05    |
| Diabetes mellitus                                    | 27 %                       | 24 %                           | 29 %                        | 0.78    |
| Current tobacco use                                  | 20 %                       | 22 %                           | 18 %                        | 0.87    |
| Coronary artery disease                              | 9 %                        | 4 %                            | 0 %                         | 0.14    |
| Heart failure                                        | 3 %                        | 0 %                            | 0 %                         | 0.19    |
| Cancer                                               | 11 %                       | 5 %                            | 6 %                         | 0.21    |
| Prior stroke or TIA                                  | 19 %                       | 27 %                           | 41 %                        | 0.06    |
| Renal dysfunction                                    | 5 %                        | 4 %                            | 0 %                         | 0.63    |
| Liver disease                                        | 2 %                        | 2 %                            | 0 %                         | 0.82    |
| History of GI bleeding                               | 3 %                        | 2 %                            | 6 %                         | 0.72    |
| CHADS2 (median, IQR)                                 | 3.0 (3.0, 4.0)             | 3.0 (3.0, 4.0)                 | 4.0(3.0, 4.0)               | 0.61    |
| CHA <sub>2</sub> DS <sub>2</sub> -VASc (median, IQR) | 5.0 (4.0, 5.0)             | 5.0 (4.0, 5.0)                 | 5.0(4.0, 5.0)               | 0.52    |
| BMI, kg/m <sup>2</sup> (mean ± s.d.)                 | 25.9±4.9                   | 25.9±5.1                       | 25.8±5.2                    | 1.0     |
| Systolic Blood Pressure,mmHg (mean ± s.d.)           | 135.3±17.0                 | 133.6±16.9                     | 141.5±19.8                  | 0.30    |
| Diastolic Blood Pressure,mmHg (mean ± s.d.)          | 78.5±11.6                  | 78.7±12.5                      | 82.9±13.9                   | 0.45    |

|                                                            |                   |                   |                  |      |
|------------------------------------------------------------|-------------------|-------------------|------------------|------|
| eGFR, mL/min per 1.73 m <sup>2</sup>                       | 74.8±19.6         | 72.5±18.5         | 74.3±15.3        | 0.65 |
| <b>Qualifying stroke:</b>                                  |                   |                   |                  |      |
| Cerebral hemisphere with cortical involvement              | 52 %              | 40 %              | 12 %             | 0.00 |
| Cerebral hemisphere,subcortical only                       | 16 %              | 26 %              | 24 %             | 0.13 |
| Brainstem only                                             | 5 %               | 5 %               | 0 %              | 0.66 |
| Cerebellum only                                            | 8 %               | 5 %               | 12 %             | 0.49 |
| Multiple Locations                                         | 20 %              | 25 %              | 53 %             | 0.01 |
| Chronic infarct on imaging (in addition to index stroke)   | 45 %              | 68 %              | 76 %             | 0.00 |
| Hemorrhagic transformation                                 | 10 %              | 8 %               | 0 %              | 0.39 |
| Evidence of old macrohemorrhage                            | 5 %               | 5 %               | 6 %              | 0.98 |
| Oral antithrombotic therapy use prior to qualifying stroke | 0 %               | 0 %               | 0 %              | 1.00 |
| Statin use prior to randomization                          | 56 %              | 64 %              | 59 %             | 0.53 |
| Treated with intravenous tPA for qualifying stroke         | 14 %              | 9 %               | 0 %              | 0.17 |
| Treated with endovascular intervention                     | 4 %               | 4 %               | 0 %              | 0.68 |
| <b>Functional measures at randomization:</b>               |                   |                   |                  |      |
| EQ-5D (median, IQR)                                        | 75.0 (60.0, 90.0) | 75.0 (60.0, 85.0) | 70.0(70.0, 85.0) | 0.45 |
| MoCA (median, IQR)                                         | 24.0 (21.0, 27.0) | 23.0 (20.0, 26.0) | 23.0(22.0, 27.0) | 0.13 |
| NIHSS score at randomization (median, IQR)                 | 0.0 (0.0, 2.0)    | 1.0 (0.0, 2.0)    | 1.0(0.0, 1.0)    | 0.50 |
| mRS at randomization (median, IQR)                         | 1.0 (0.0, 2.0)    | 1.0 (1.0, 2.0)    | 2.0(1.0, 2.0)    | 0.20 |
| LV ejection fraction                                       | 63.1±8.9          | 65.7±7.3          | 62.2±9.7         | 0.05 |
| LV hypertrophy                                             | 25 %              | 22 %              | 65 %             | 0.00 |
| <b>Functional outcomes at 12 months:</b>                   |                   |                   |                  |      |
| EQ-5D (median, IQR)                                        | 80.0 (70.0, 90.0) | 80.0 (60.0, 90.0) | 80.0(60.0, 80.0) | 0.28 |
| MoCA (median, IQR)                                         | 25.0 (22.0, 27.0) | 22.5 (20.0, 26.5) | 23.0(20.0, 27.0) | 0.24 |

**Abbreviations:** BMI, body mass index; CMB, cerebral microbleed; eGFR, estimated glomerular filtration rate; ESUS, embolic stroke of undetermined source; GI, gastrointestinal; IQR, interquartile range; LV, left ventricular; MoCA, Montreal Cognitive Assessment; mRS, modified Rankin Scale; NIHSS, National Institutes of Health Stroke Scale; TIA, transient ischemic attack; tPA, tissue plasminogen activator



**eTable 3.** Baseline Characteristics and MRI Findings by Cerebral Microbleed Topography

| Characteristic                                       | Strictly deep (N=213) | Strictly lobar (N=102) | Mixed (N=73)  | pvalue |
|------------------------------------------------------|-----------------------|------------------------|---------------|--------|
| Age, years (mean ± s.d.)                             | 70.0±9.1              | 68.3±10.4              | 69.6±9.4      | 0.35   |
| Age<60 years                                         | 14 %                  | 23 %                   | 15 %          | 0.18   |
| Male sex                                             | 60 %                  | 62 %                   | 62 %          | 0.93   |
| <b>Race:</b>                                         |                       |                        |               |        |
| White only                                           | 49 %                  | 63 %                   | 41 %          | 0.01   |
| Black only                                           | 2 %                   | 2 %                    | 5 %           | 0.31   |
| East Asian only                                      | 44 %                  | 23 %                   | 44 %          | 0.00   |
| Others (includes not reported/multiracial)           | 5 %                   | 13 %                   | 10 %          | 0.03   |
| <b>Global region:</b>                                |                       |                        |               |        |
| U.S.A. and Canada                                    | 12 %                  | 25 %                   | 16 %          | 0.01   |
| Latin America                                        | 3 %                   | 3 %                    | 7 %           | 0.25   |
| Western Europe                                       | 36 %                  | 46 %                   | 34 %          | 0.16   |
| Eastern Europe                                       | 7 %                   | 5 %                    | 1 %           | 0.22   |
| East Asia                                            | 43 %                  | 21 %                   | 41 %          | 0.00   |
| <b>Medical history:</b>                              |                       |                        |               |        |
| Hypertension                                         | 84 %                  | 87 %                   | 90 %          | 0.32   |
| Diabetes mellitus                                    | 26 %                  | 30 %                   | 23 %          | 0.54   |
| Current tobacco use                                  | 19 %                  | 21 %                   | 22 %          | 0.87   |
| Coronary artery disease                              | 6 %                   | 12 %                   | 5 %           | 0.15   |
| Heart failure                                        | 2 %                   | 4 %                    | 3 %           | 0.56   |
| Cancer                                               | 8 %                   | 13 %                   | 8 %           | 0.37   |
| Prior stroke or TIA                                  | 23 %                  | 22 %                   | 23 %          | 0.93   |
| Renal dysfunction                                    | 5 %                   | 1 %                    | 4 %           | 0.20   |
| Liver disease                                        | 2 %                   | 2 %                    | 0 %           | 0.43   |
| History of GI bleeding                               | 1 %                   | 2 %                    | 5 %           | 0.13   |
| CHADS2 (median, IQR)                                 | 3.0 (3.0, 4.0)        | 4.0 (3.0, 4.0)         | 3.0(3.0, 4.0) | 0.73   |
| CHA <sub>2</sub> DS <sub>2</sub> -VASc (median, IQR) | 5.0 (4.0, 5.0)        | 5.0 (4.0, 6.0)         | 5.0(4.0, 6.0) | 0.95   |
| BMI, kg/m <sup>2</sup> (mean ± s.d.)                 | 26.1±4.8              | 26.3±4.3               | 25.7±5.5      | 0.69   |
| Systolic Blood Pressure,mmHg (mean ± s.d.)           | 135.7±17.6            | 134.9±17.5             | 134.7±18.7    | 0.90   |
| Diastolic Blood Pressure,mmHg (mean ± s.d.)          | 78.5±12.2             | 79.1±12.1              | 79.0±12.4     | 0.90   |

|                                                            |                   |                   |                  |      |
|------------------------------------------------------------|-------------------|-------------------|------------------|------|
| eGFR, mL/min per 1.73 m <sup>2</sup>                       | 76.3±21.2         | 73.5±18.1         | 72.4±20.3        | 0.29 |
| <b>Qualifying stroke:</b>                                  |                   |                   |                  |      |
| Cerebral hemisphere with cortical involvement              | 41 %              | 61 %              | 44 %             | 0.00 |
| Cerebral hemisphere, subcortical only                      | 22 %              | 10 %              | 22 %             | 0.02 |
| Brainstem only                                             | 4 %               | 4 %               | 4 %              | 0.99 |
| Cerebellum only                                            | 8 %               | 4 %               | 4 %              | 0.21 |
| Multiple Locations                                         | 24 %              | 22 %              | 26 %             | 0.79 |
| Chronic infarct on imaging (in addition to index stroke)   | 51 %              | 45 %              | 67 %             | 0.01 |
| Hemorrhagic transformation                                 | 8 %               | 17 %              | 10 %             | 0.08 |
| Evidence of old macrohemorrhage                            | 7 %               | 3 %               | 4 %              | 0.28 |
| Oral antithrombotic therapy use prior to qualifying stroke | 0 %               | 0 %               | 0 %              | 1.00 |
| Statin use prior to randomization                          | 57 %              | 61 %              | 64 %             | 0.51 |
| Treated with intravenous tPA for qualifying stroke         | 11 %              | 18 %              | 8 %              | 0.11 |
| Treated with endovascular intervention                     | 4 %               | 7 %               | 4 %              | 0.45 |
| <b>Functional measures at randomization:</b>               |                   |                   |                  |      |
| EQ-5D (median, IQR)                                        | 75.0 (64.0, 90.0) | 75.0 (60.0, 90.0) | 72.0(60.0, 85.0) | 0.63 |
| MoCA (median, IQR)                                         | 24.0 (21.0, 27.0) | 25.0 (22.0, 27.0) | 22.0(19.5, 26.5) | 0.03 |
| NIHSS score at randomization (median, IQR)                 | 1.0 (0.0, 2.0)    | 0.0 (0.0, 1.0)    | 1.0(0.0, 2.0)    | 0.32 |
| mRS at randomization (median, IQR)                         | 1.0 (0.0, 2.0)    | 1.0 (0.0, 2.0)    | 1.0(1.0, 2.0)    | 0.10 |
| LV ejection fraction                                       | 63.6±8.2          | 61.8±8.9          | 64.7±7.8         | 0.11 |
| LV hypertrophy                                             | 23 %              | 32 %              | 38 %             | 0.03 |
| <b>Functional outcomes at 12 months:</b>                   |                   |                   |                  |      |
| EQ-5D (median, IQR)                                        | 80.0 (70.0, 90.0) | 80.0 (70.0, 90.0) | 70.0(50.0, 85.0) | 0.12 |
| MoCA (median, IQR)                                         | 25.0 (21.0, 27.0) | 25.0 (22.0, 27.0) | 23.5(20.0, 26.5) | 0.51 |

**Abbreviations:** BMI, body mass index; CMB, cerebral microbleed; eGFR, estimated glomerular filtration rate; ESUS, embolic stroke of undetermined source; GI, gastrointestinal; IQR, interquartile range; LV, left ventricular; MoCA, Montreal Cognitive Assessment; mRS, modified Rankin Scale; NIHSS, National Institutes of Health Stroke Scale; TIA, transient ischemic attack; tPA, tissue plasminogen activator

**eTable 4. Recurrent Stroke Subtypes by Cerebral Microbleed Status**

| <b>Subgroup</b>          | <b>ESUS (N=90)</b> | <b>Lacunar (N=27)</b> | <b>Cardioembolic (N=25)</b> | <b>Atherosclerosis (N=13)</b> | <b>Other (N=10)</b> | <b>pvalue</b> |
|--------------------------|--------------------|-----------------------|-----------------------------|-------------------------------|---------------------|---------------|
| <b>CMB Presence</b>      |                    |                       |                             |                               |                     |               |
| None CMB                 | 79(2.4%)           | 21(0.6%)              | 21(0.6%)                    | 12(0.4%)                      | 7(0.2%)             |               |
| CMB                      | 11(2.8%)           | 6(1.5%)               | 4(1.0%)                     | 1(0.3%)                       | 3(0.8%)             | 0.3154        |
| <b>CMB Count</b>         |                    |                       |                             |                               |                     |               |
| 1-2 CMBs                 | 5(2.3%)            | 1(0.5%)               | 3(1.4%)                     | 1(0.5%)                       | 1(0.5%)             |               |
| 3 or more CMBs           | 3(2.9%)            | 3(2.9%)               | 0(0.0%)                     | 0(0.0%)                       | 0(0.0%)             | 0.4515        |
| <b>CMB topography</b>    |                    |                       |                             |                               |                     |               |
| Strictly deep/mixed CMBs | 5(1.7%)            | 4(1.4%)               | 2(0.7%)                     | 1(0.3%)                       | 3(1.0%)             |               |
| Strictly lobar CMBs      | 6(5.9%)            | 2(2.0%)               | 2(2.0%)                     | 0(0.0%)                       | 0(0.0%)             | 0.3088        |

**eTable 5. Efficacy in CMB Subgroups -- Recurrent Stroke**

| Subgroup                    | Rivaroxaban assigned<br>(N=1872) |                                 | Aspirin-assigned<br>(N=1827) |                                 | Hazard Ratio<br>(95% CI) | pvalue<br>(interaction)*<br>* |
|-----------------------------|----------------------------------|---------------------------------|------------------------------|---------------------------------|--------------------------|-------------------------------|
|                             | No. Rand                         | No. Events<br>(Events<br>Rate*) | No. Rand                     | No. Events<br>(Events<br>Rate*) |                          |                               |
| <b>CMB Presence</b>         |                                  |                                 |                              |                                 |                          |                               |
| None                        | 1672                             | 81 (5.0)                        | 1632                         | 80 (5.1)                        | 0.99 (0.73,<br>1.35)     |                               |
| CMB                         | 200                              | 18 (10.0)                       | 195                          | 11 (5.6)                        | 1.68 (0.79,<br>3.56)     | 0.20                          |
| <b>CMB burden</b>           |                                  |                                 |                              |                                 |                          |                               |
| No CMB                      | 1672                             | 81 (5.0)                        | 1632                         | 80 (5.1)                        | 0.99 (0.73,<br>1.35)     |                               |
| 1-2 CMBs                    | 104                              | 6 (6.3)                         | 114                          | 6 (5.1)                         | 1.19 (0.38,<br>3.69)     |                               |
| 3 or more CMBs              | 59                               | 8 (15.4)                        | 43                           | 0 (0.0)                         |                          | 0.96                          |
| <b>CMB topography</b>       |                                  |                                 |                              |                                 |                          |                               |
| No CMB                      | 1672                             | 81 (5.0)                        | 1632                         | 80 (5.1)                        | 0.99 (0.73,<br>1.35)     |                               |
| Strictly deep/mixed<br>CMBs | 152                              | 12 (8.8)                        | 134                          | 5 (3.7)                         | 2.27 (0.80,<br>6.44)     |                               |
| Strictly lobar CMBs         | 45                               | 6 (14.1)                        | 57                           | 6 (10.6)                        | 1.36 (0.44,<br>4.22)     | 0.30                          |

\* Event rates reported in 100-Person Years

\*\* Hazard Ratio, 95% CI, and p for interaction not reported if Hazard Ratio is  $\geq 10$  or cannot be computed

**eTable 6. Efficacy in CMB Subgroups -- Ischemic Stroke**

| Subgroup                    | Rivaroxaban assigned<br>(N=1872) |                              | Aspirin-assigned<br>(N=1827) |                              | Hazard Ratio<br>(95% CI) | pvalue<br>(interaction)** |
|-----------------------------|----------------------------------|------------------------------|------------------------------|------------------------------|--------------------------|---------------------------|
|                             | No. Rand                         | No. Events<br>(Events Rate*) | No. Rand                     | No. Events<br>(Events Rate*) |                          |                           |
| <b>CMB Presence</b>         |                                  |                              |                              |                              |                          |                           |
| None                        | 1672                             | 75 (4.7)                     | 1632                         | 78 (4.9)                     | 0.94 (0.69, 1.29)        |                           |
| CMB                         | 200                              | 15 (8.3)                     | 195                          | 11 (5.6)                     | 1.41 (0.65, 3.06)        | 0.3348                    |
| <b>CMB Severity</b>         |                                  |                              |                              |                              |                          |                           |
| No CMB                      | 1672                             | 75 (4.7)                     | 1632                         | 78 (4.9)                     | 0.94 (0.69, 1.29)        |                           |
| 1-2 CMBs                    | 104                              | 5 (5.2)                      | 114                          | 6 (5.1)                      | 0.99 (0.30, 3.23)        |                           |
| 3 or more CMBs              | 59                               | 6 (11.5)                     | 43                           | 0 (0.0)                      |                          | 0.9975                    |
| <b>CMB topography</b>       |                                  |                              |                              |                              |                          |                           |
| No CMB                      | 1672                             | 75 (4.7)                     | 1632                         | 78 (4.9)                     | 0.94 (0.69, 1.29)        |                           |
| Strictly deep/mixed<br>CMBs | 152                              | 10 (7.4)                     | 134                          | 5 (3.7)                      | 1.90 (0.65, 5.57)        |                           |
| Strictly lobar CMBs         | 45                               | 5 (11.8)                     | 57                           | 6 (10.6)                     | 1.13 (0.34, 3.71)        | 0.4603                    |

\* Event rates reported in 100-Person Years

\*\* Hazard Ratio, 95% CI, and p for interaction not reported if Hazard Ratio is  $\geq 10$  or cannot be computed

**eTable 7. Efficacy in CMB Subgroups --All-Cause Mortality**

| Subgroup                    | Rivaroxaban assigned<br>(N=1872) |                              | Aspirin-assigned<br>(N=1827) |                              | Hazard Ratio<br>(95% CI) | pvalue<br>(interaction)** |
|-----------------------------|----------------------------------|------------------------------|------------------------------|------------------------------|--------------------------|---------------------------|
|                             | No. Rand                         | No. Events<br>(Events Rate*) | No. Rand                     | No. Events<br>(Events Rate*) |                          |                           |
| <b>CMB Presence</b>         |                                  |                              |                              |                              |                          |                           |
| None                        | 1672                             | 24 (1.4)                     | 1632                         | 15 (0.9)                     | 1.59 (0.83, 3.02)        |                           |
| CMB                         | 200                              | 5 (2.6)                      | 195                          | 5 (2.5)                      | 1.08 (0.31, 3.75)        | 0.5829                    |
| <b>CMB Severity</b>         |                                  |                              |                              |                              |                          |                           |
| No CMB                      | 1672                             | 24 (1.4)                     | 1632                         | 15 (0.9)                     | 1.59 (0.83, 3.02)        |                           |
| 1-2 CMBs                    | 104                              | 5 (5.0)                      | 114                          | 3 (2.5)                      | 2.07 (0.49, 8.69)        |                           |
| 3 or more CMBs              | 59                               | 0 (0.0)                      | 43                           | 0 (0.0)                      |                          | 0.9553                    |
| <b>CMB topography</b>       |                                  |                              |                              |                              |                          |                           |
| No CMB                      | 1672                             | 24 (1.4)                     | 1632                         | 15 (0.9)                     | 1.59 (0.83, 3.02)        |                           |
| Strictly deep/mixed<br>CMBs | 152                              | 3 (2.1)                      | 134                          | 3 (2.1)                      | 1.07 (0.21, 5.34)        |                           |
| Strictly lobar CMBs         | 45                               | 2 (4.3)                      | 57                           | 2 (3.4)                      | 1.29 (0.18, 9.17)        | 0.8675                    |

\* Event rates reported in 100-Person Years

\*\* Hazard Ratio, 95% CI, and p for interaction not reported if Hazard Ratio is  $\geq 10$  or cannot be computed

**eTable 8.** Efficacy in CMB Subgroups—Intracerebral Hemorrhage

| Subgroup            | Rivaroxaban assigned (N = 1872) |                                       | Aspirin-assigned (N = 1827) |                                       | Hazard ratio (95% CI) | P value for interaction |
|---------------------|---------------------------------|---------------------------------------|-----------------------------|---------------------------------------|-----------------------|-------------------------|
|                     | No. Rand                        | No. events (events rate) <sup>a</sup> | No. Rand                    | No. events (events rate) <sup>a</sup> |                       |                         |
| CMB presence        |                                 |                                       |                             |                                       |                       |                         |
| None                | 1672                            | 6 (0.4)                               | 1632                        | 2 (0.1)                               | 2.96 (0.60-14.66)     | NA                      |
| CMB                 | 200                             | 3 (1.6)                               | 195                         | 1 (0.5)                               | 3.12 (0.32-30.01)     | .97                     |
| CMB burden          |                                 |                                       |                             |                                       |                       |                         |
| None                | 1672                            | 6 (0.4)                               | 1632                        | 2 (0.1)                               | 2.96 (0.60-14.66)     | NA                      |
| 1-2                 | 104                             | 1 (1.0)                               | 114                         | 0 (0.0)                               |                       | NA                      |
| 3 or more           | 59                              | 2 (3.5)                               | 43                          | 1 (2.4)                               | 1.43 (0.13-15.82)     | .89                     |
| CMB topography      |                                 |                                       |                             |                                       |                       |                         |
| None                | 1672                            | 6 (0.4)                               | 1632                        | 2 (0.1)                               | 2.96 (0.60-14.66)     | NA                      |
| Strictly deep/mixed | 152                             | 2 (1.4)                               | 134                         | 1 (0.7)                               | 1.98 (0.18-21.92)     | NA                      |
| Strictly lobar      | 45                              | 1 (2.2)                               | 57                          | 0 (0.0)                               |                       | .96                     |

Abbreviations: CMB, cerebral microbleed; NA, not applicable.

<sup>a</sup>Event rates reported in 100-person years.
