# Supplementary material
Source: PubMed Central journal article supplement (PMC7573796)
Supplement: jamaneurol-e203836-s003.pdf [file jamaneurol-e203836-s003.pdf]

## **Data Sharing Statement**

Shoamanesh. Microbleeds and the Effect of Anticoagulation in Patients With Embolic Stroke of Undetermined Source. *JAMA Neurol.* Published October 19, 2020. 10.1001/jamaneurol.2020.3836

### **Data**

**Data available:** No
